# Supplementary material
Source: MDPI journal article supplement (https://www.mdpi.com/2079-9284/10/6/150)
Supplement: s1 [file s1]

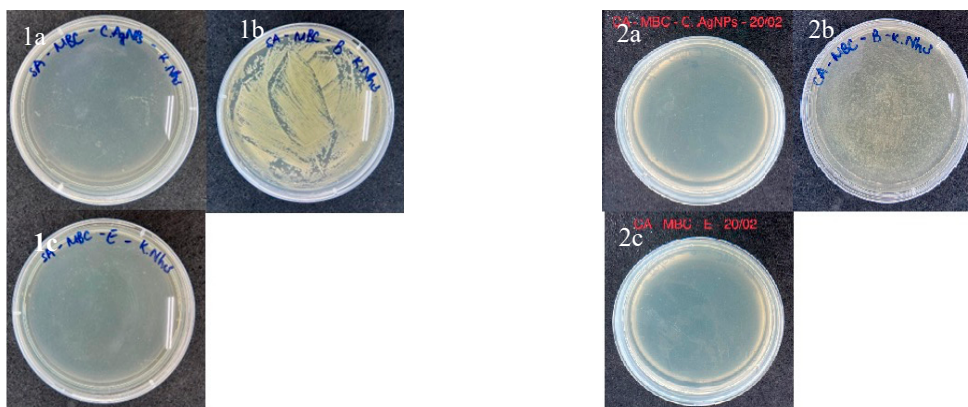

**Figure S1.** Visualization of minimum bactericidal concentration assay on (1) *S. aureus* and (2) *C. acnes* with (a) AgNPs (125 ug/mL for *S. aureus* and 15.625 ug/mL for *C. acnes*), (b) negative control (sterile water), and (c) erythromycin (4000 ug/mL).

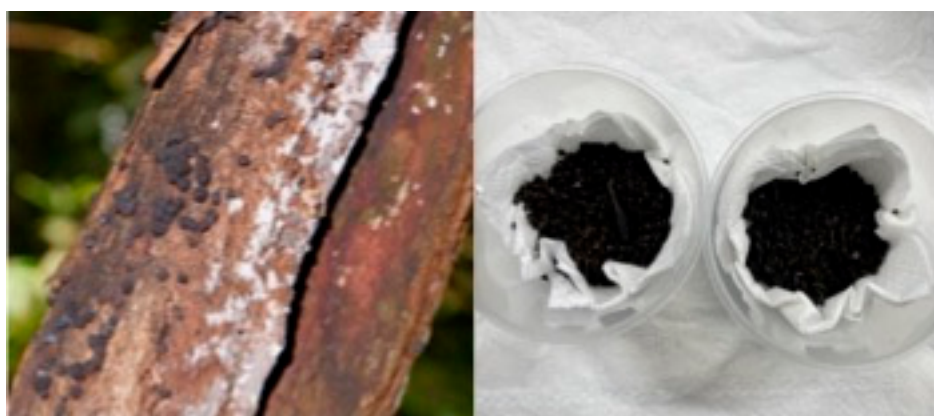

**Figure S2.** Black stromata/fruiting bodies of *Xylaria* sp.
